# Supplementary material for: Views of patients with progressive illness and carers about the role of digital advance care planning systems to record and share information: A qualitative study
Source: PubMed Central journal article supplement (PMC11290031; doi:10.1177/02692163241255511), 2024-05-30
Supplement: sj-pdf-1-pmj-10.1177_02692163241255511.pdf [file sj-pdf-1-pmj-10.1177_02692163241255511.pdf]

**Supplementary Appendix 1: Overview of eligibility and approach to recruitment of participants by setting**

| <b>Setting</b>           | <b>Eligibility</b>                                                                                                                                                                                                                                                                                                       | <b>Person responsible for approaching potential participants</b>                                                                |
|--------------------------|--------------------------------------------------------------------------------------------------------------------------------------------------------------------------------------------------------------------------------------------------------------------------------------------------------------------------|---------------------------------------------------------------------------------------------------------------------------------|
| Hospices                 | <p>Patient participants: registered on a palliative care clinical nurse specialist or specialist doctor caseload or to attend a regular hospice-based activity group or complementary therapy.</p> <p>Carer participants: either current carers of registered patients or were attending bereavement support groups.</p> | Hospice research nurses and doctors identified eligible individuals and carried out repeated searches for new listings monthly. |
| Care homes               | Care home residents identified as having a palliative diagnosis.                                                                                                                                                                                                                                                         | Care home manager.                                                                                                              |
| PPIE and Advocacy groups | People with personal experience of a life-limiting condition, either as a patient or carer.                                                                                                                                                                                                                              | Advertised the study to members of the public registered with their networks.                                                   |

Participants who self-reported experience, expressed an interest, and confirmed consent to be contacted were then contacted by a member of the research team.

## Supplementary Appendix 2: Interview schedule and topic guide

*This workshop topic guide will be a living document.*

*The design is iterative to be flexible to the needs of the group and the discussion that arises during the workshop.*

*It should be adapted as considered appropriate for individual, dyad and online interviews.*

### 1. Welcome to the group

- Thank you for agreeing to take part in this focus group.
- As you know, we are talking to patients and caregivers about their understandings, views and experiences of the use of electronic patient records systems in end of life care.
- With your permission I would like to record the workshop; all details will be confidential and names will be changed to prevent identification.
- There are no right and wrong answers to the questions.
- If you do not hear or understand a particular question, please ask for clarification.
- You can choose not to answer a particular question, without needing to give a reason
- Please respect each other's privacy and confidentiality and take care not to repeat information about the other people attending today
- Do you have any questions or concerns?

### 2. Consent

- Review the information sheet and opportunity to ask questions
- Obtain written consent
- Complete demographic forms
- Complete confidentiality agreements

### 3. Introductions to the group/interview

- Brief introduction of interviewer(s) and their role, including research interests.
- Invite participants to introduce themselves to the group.

### 4. Introduction to the project

- What advance care planning is
- How digital patient records systems can support documentation of advance care plans
- Examples of where it might work and where it might not work

**Start audio-recorder here and announce that we are now recording**

## Topic guide

### General Opening

- What experiences have you had with shared patient records?
- What experiences have you had with sharing information about wishes and preferences for care?
  - Can you remember who told you about them and what you thought at the time?

### Discussion 1: Patient and care priorities for sharing wishes and preferences for care

- Content of the record – what information should it include? How would this benefit you?
- Inclusivity – how can digital records for documenting and sharing patient wishes and preferences accommodate different individual and cultural needs?
- Approach (as a digital versus/supporting paper solution)?

### Discussion 2: Patient and care priorities for accessing and sharing

#### *Access*

- Who do you think should access these records (e.g., patients, carers, family, healthcare professionals)?
- What do you think different people should be permitted to access?
- How do you think different people might access it?
- What would need to be in place for access to be made easy (e.g., technologies)?

#### *Documentation and sharing*

- Which health professionals/others should initiate discussions and document your preferences?
- Which health professionals and services should these be shared between?
- How would you like these records to be shared and with whom?
- When and what? Repeated conversations/ review conversations?
- What about confidentiality and data security?

### Discussion section 3: Overall reflections and changes

- Were you aware of these records?
- Have you spoken about them with healthcare professionals?
- Do you feel involved in their creation and sharing?
- Priorities – what needs doing now - what can wait – what will need time to be developed?
- How do you think sharing plans will help services to run better?
- How do you think you would benefit from their use?

- What issues or concerns might arise for you or health professionals?

### Appendix 3: Coding framework

| Research question                                                                                                  | Initial Coding framework and brief description                                                                                                                                                                                                                                                                                                                                                                                    | Refined themes                                                                                           |
|--------------------------------------------------------------------------------------------------------------------|-----------------------------------------------------------------------------------------------------------------------------------------------------------------------------------------------------------------------------------------------------------------------------------------------------------------------------------------------------------------------------------------------------------------------------------|----------------------------------------------------------------------------------------------------------|
| <b>Context</b><br>Interview or focus group                                                                         | <b>Session information</b><br>About the group or individual/dyad interview                                                                                                                                                                                                                                                                                                                                                        |                                                                                                          |
| <b>Context</b><br>Personal                                                                                         | <b>A. About me:</b><br>About the person (e.g. condition, family, social), which services and health professionals are involved                                                                                                                                                                                                                                                                                                    | Theme 2: <i>if a support with decision or documentation need</i><br><br>Theme 4: <i>if a system need</i> |
| <b>RQ1</b><br>What are experiences of EPaCCS use?                                                                  | <b>B. Experience:</b> <ul style="list-style-type: none"> <li>a. Digital documentation &amp; sharing of ACP information preferences</li> <li>b. Other ways of documenting ACP information</li> <li>c. Electronic documentation &amp; sharing of health information</li> <li>d. Issues encountered with planning, documenting or sharing ACP or health information</li> <li>e. Benefits of using EPaCCS to document ACPs</li> </ul> | Theme 1                                                                                                  |
| <b>RQ2a</b><br>What access, and ability to update, do patients want from their own EPaCCS record?                  | <b>C. Preferences for patient and carer access</b> <ul style="list-style-type: none"> <li>a. Level of access view/edit</li> <li>b. Carer access</li> <li>c. Benefits of own access</li> <li>d. Concerns about own access</li> </ul>                                                                                                                                                                                               | Theme 4                                                                                                  |
| <b>RQ2b</b><br>What are patients' and families' preferences on how EPaCCS is used?                                 | <b>D. Preferences for sharing information (who, what, when):</b> <ul style="list-style-type: none"> <li>a. Introduce, think &amp; discuss</li> <li>b. Document, review &amp; update</li> <li>c. Share, access, view &amp; action</li> </ul>                                                                                                                                                                                       | Theme 2                                                                                                  |
| <b>RQ2c</b><br>What should be prioritised to record and share on an EPaCCS record?                                 | <b>E. System priorities:</b> <ul style="list-style-type: none"> <li>a. Type of information to document</li> <li>b. Content of my record</li> <li>c. What systems need to do to support use</li> </ul>                                                                                                                                                                                                                             | Theme 4                                                                                                  |
| <b>RQ2d</b><br>What are the priority outcomes or benefits for patients with an EPaCCS record and their caregivers? | <b>F. Perceived value and benefit:</b> <ul style="list-style-type: none"> <li>a. Patients</li> <li>b. Carers</li> <li>c. Health and care services</li> </ul>                                                                                                                                                                                                                                                                      | Theme 3                                                                                                  |
| <b>RQ2e</b><br>What does a system need to do to meet individual needs?                                             | <b>G. Inclusivity</b> <ul style="list-style-type: none"> <li>a. Digital inclusion</li> <li>b. Equity in having an advance care plan</li> <li>c. Anything else?</li> </ul>                                                                                                                                                                                                                                                         | Theme 2: <i>if a support with decision or documentation need</i>                                         |

|                      |                                                |                                  |
|----------------------|------------------------------------------------|----------------------------------|
|                      |                                                | Theme 4: <i>if a system need</i> |
| <b>Miscellaneous</b> | Any aspects to generate further research ideas |                                  |
| <b>Not relevant</b>  |                                                |                                  |

**Theme 1:** Why *haven't you read what's wrong with me?*; uncertainty around professionals' documenting, sharing and use of information

**Theme 2:** The art of decision-making relies on the art of conversation

**Theme 3:** The perceived value in having "*a say in matters*": control and responsibility

**Theme 4:** Enabling patient and carer control of their records: "*custodianship is key*"
